# Supplementary material for: Dilute acid pretreatment of rice straw, structural characterization and optimization of enzymatic hydrolysis conditions by response surface methodology
Source: Royal Society of Chemistry journal article supplement (doi:10.1039/c5ra04430h), 2015-01-01
Supplement: c5ra04430h1.pdf [file c5ra04430h1.pdf]

### Details of commercial enzymes

- 1) Celluclast 1.5L (700EGU/g , 60 FPU/ml)
- 2) Hemicellulase from aspergilus niger (1.5 U/mg)
- 3)  $\beta$ -Glucosidase from almonds (6 U/mg)

Table s1 enzymes ratio used for enzymatic hydrolysis condition optimization.

| Name of Enzymes | cellulase | Hemicellulase | $\beta$ -Glucosidase |
|-----------------|-----------|---------------|----------------------|
| A               | 1         | 1             | 1                    |
| B               | 1         | 0             | 0                    |
| C               | 1         | 2.5           | 2                    |
| D               | 2         | 1             | 1                    |
| E               | 0         | 1             | 1                    |

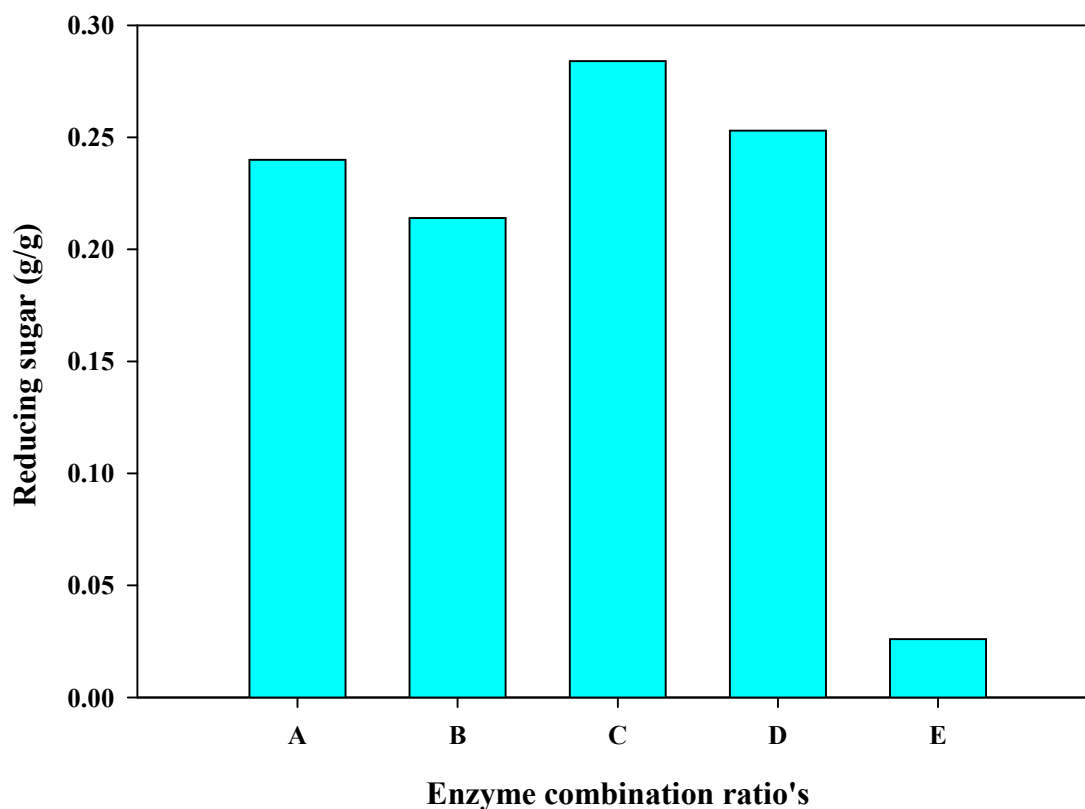

Fig s1 Enzyme combination ratio optimization for enzymatic hydrolysis.

**Table s2 Table 1** Coded values of the variables for the central composite design

| Variable                       | Symbol | Actual and coded values |       |       |       |       |
|--------------------------------|--------|-------------------------|-------|-------|-------|-------|
|                                |        | coded                   |       |       |       |       |
|                                |        | -2                      | -1    | 0     | 1     | 2     |
| Biomass loading(w/v) variable  | A      | 10                      | 12.5  | 15    | 17.5  | 20    |
| Incubation time (hour)         | B      | 0                       | 24    | 48    | 72    | 96    |
| Protein loading (mg/g)         | C      | 25                      | 50    | 75    | 100   | 125   |
| Surfactant concentration (w %) | D      | 0                       | 0.050 | 0.125 | 0.200 | 0.275 |
